# Supplementary material for: Anti-Obesity Natural Products Tested in Juvenile Zebrafish Obesogenic Tests and Mouse 3T3-L1 Adipogenesis Assays
Source: Molecules. 2020 Dec 10;25(24):5840. doi: 10.3390/molecules25245840 (PMC7764013; doi:10.3390/molecules25245840)
Supplement: Supplementary file 1 [file molecules-25-05840-s001.xlsx]

## Sheet: Sheet1
	ID	Name of natural produtc	Origin	Additional information
	NP01	Porcin globin digested peptides (GDP)		METAP®
	NP02	GDP with seaweed-derived and magnesium		METABALANCE B®
	NP03	Licorice extract	Root	Glycyrrhizin acid 12.5%
	NP04	Angelica keiskei extract	Leaf	Total chalcone > 8%
	NP05	Monostroma nitidum powder	Whole
	NP06	Beetroot extract	Root	Nitrate 2%
	NP07	Plectranthus barbatus powder	Rhizome	Forslkolin 10%
	NP08	Green tea extract	Leaf	Total polyphenol > 80% Catechin > 70%
	NP09	Curcumin (Curcuma longa) powder	Root	Total curcuminoids > 95% curcumin > 70%
	NP10	Kaempferia parviflora extract	Root	5,7-Dimethoxyflavone 2.5% Total flavonoids 10%
	NP11	Ginger extract	Rhizome	Contains 5% gingerol
	NP12	Piper longum extract	Fruit and seed	Piperine 1.5%
	NP13	Cinnamon extract	Bark
	NP14	Ellagic acid (Pomegranate extract)	Peel	Ellagic acid > 80%
	NP15	Garlic extract	Bulb	Alliin > 5%
	NP16	L-Mentol	-	L-Mentol > 98%
	NP17	Citrus junos extract	Seed	Limonene > 0.5%
	NP18	Allyl isothiocyanate (Japanese mustard)	Oil	Allyl isothiocyanate > 97%
	NP19	Zanthoxylum piperitum powder	Fruit	Sanshool Hyperin
	NP20	Peppermint extract	Leaf
	NP21	Elastin (water soluble) from Porcine	Ligament	Desmosine Isodesmosine
	NP22	Cistanche tubulosa extract	Flesh stem	Phenylethanoid glycosides > 50% Acteoside > 9%
	NP23	Curcuma amada extract	Root and stem
	NP24	Hericium erinaceus powder	Whole	Amyloban > 6% Hericenone > 0.5%
	NP25	Bioperine		Purity 95%
	NP26	Magnesium hydroxide		Magnesium hydroxide 96.4%
	NP27	Pea protein		Protein 80%
	NP28	Branched Chain Amino Acids		Purity 95%
	NP29	Red pepper extract	Fruit	Capsaicin 1%
	NP30	Collagen peptides from fish
	NP31	Sodium hyaluronate		Sodium hyaluronate > 99%
	NP32	Extract of fermentation of cereals		Digezyme®
	NP33	Cinnamon powder	Bark
	NP34	Soy isoflavones		Soy isoflavones 40%
	NP35	Lactic acid bacteria powder		Lactobacillus paracasei MCC1849 strain
	NP36	Nobiletine (from orange)	Peel
	NP37	Minerals from Lithothamnion red algae		Aquamin®
	NP38	Moringa oleifera powder	Leaf
	Blue indicates effective only in ZOT
	Green indicates effective only in 3T3-L1 cell-based assay
	Yellow indicates effective in ZOT and 3T3-L1 cell-based assay
